# Supplementary material for: A Single-Cell Bioprinting Method to Reconstruct Native Cellular Microenvironments with Subcellular Resolution
Source: Research Square preprint supplement (doi:10.21203/rs.3.rs-9310069/v1), 2026-06-03
Supplement: Supplementary file 4 [file b44105c08ddd379edece3761.pdf]

| Instrument                       | Reproducible single-cell deposition? | Smallest single-cell spacing demonstrated                                                                                  | Max cell types/populations used in a print | Demonstrate Native Tissue Reconstruction?                                                                                                                         | Citation |                         |    |                      |
|----------------------------------|--------------------------------------|----------------------------------------------------------------------------------------------------------------------------|--------------------------------------------|-------------------------------------------------------------------------------------------------------------------------------------------------------------------|----------|-------------------------|----|----------------------|
| <b>Laser Bioprinting</b>         |                                      |                                                                                                                            |                                            |                                                                                                                                                                   |          |                         |    |                      |
| NGB-R, Poietis                   | No                                   | Missing spots and doublets+<br>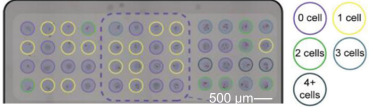           | 500 μm                                     | Distance measured between spots, variable cell placement within each spot<br>   | 2        | HUVEC and hMSC          | No | Bosmans et al. [1]   |
| Custom                           | Yes                                  | One cell per target<br>                   | < 20 μm                                    | Inconsistent spacing and control<br>                                            | 2        | hMSC and hTSPCs         | No | Zhang, J. et al. [2] |
| <b>Inkjet Bioprinting</b>        |                                      |                                                                                                                            |                                            |                                                                                                                                                                   |          |                         |    |                      |
| Custom                           | Yes                                  | One cell per spot, no missing spots<br> | 400 μm                                     |                                                                               | 3        | NIH 3T3 in three colors | No | Zhang, P. et al. [3] |
| JetLab II, MicroFab Technologies | No                                   | Missing spots and doublets+<br>         | 200 μm                                     | Distance measured between spots, variable cell placement within each spot<br> | 3        | NIH3T3 in three colors  | No | Park et al. [4]      |
| <b>Microfluidic Bioprinting</b>  |                                      |                                                                                                                            |                                            |                                                                                                                                                                   |          |                         |    |                      |
| Biopixlar, Fluicell              | Yes                                  | One cell per spot, no missing spots<br> | 500 μm                                     |                                                                               | 2        | HaCaT and A431          | No | Jeffries et al. [5]  |
