# Supplementary figures and images for: A Single-Cell Bioprinting Method to Reconstruct Native Cellular Microenvironments with Subcellular Resolution
Source: Research Square preprint supplement (doi:10.21203/rs.3.rs-9310069/v1), 2026-06-03

**A**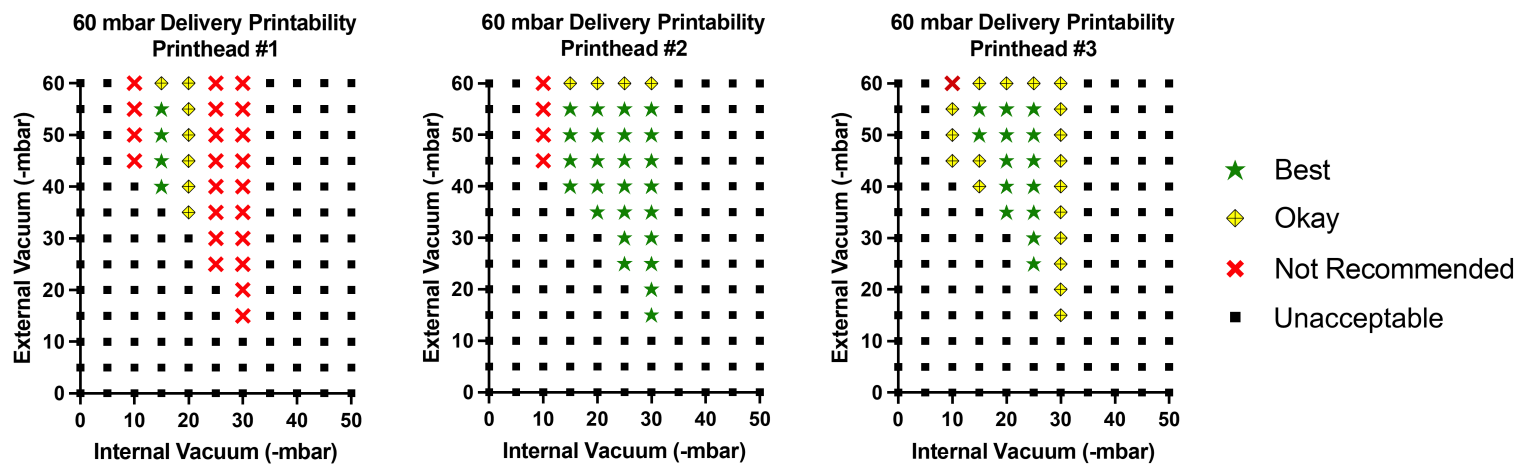**B**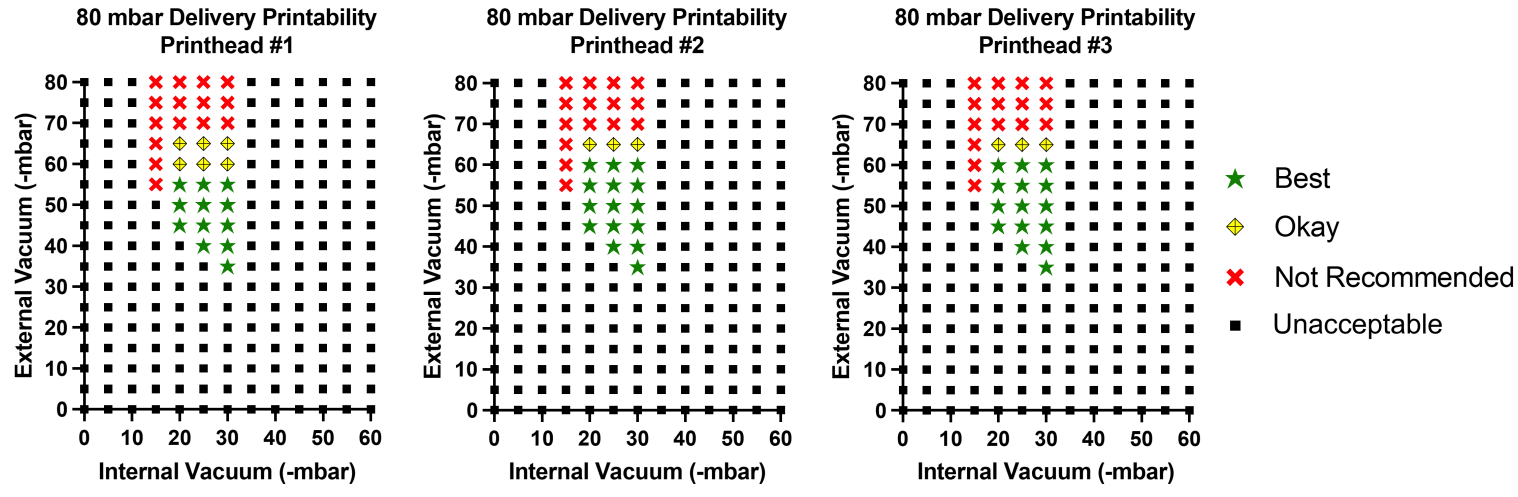**C**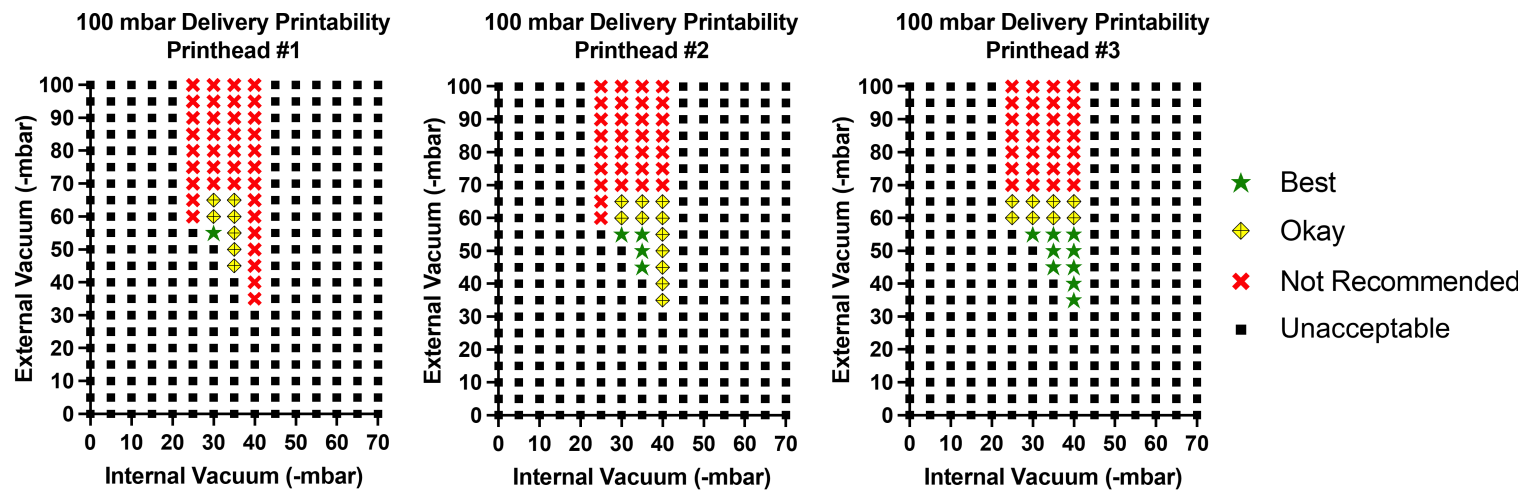

Supplement: Supplementary file 1 [file 0b17cd42863bcc24b875b23e.pdf]

**A**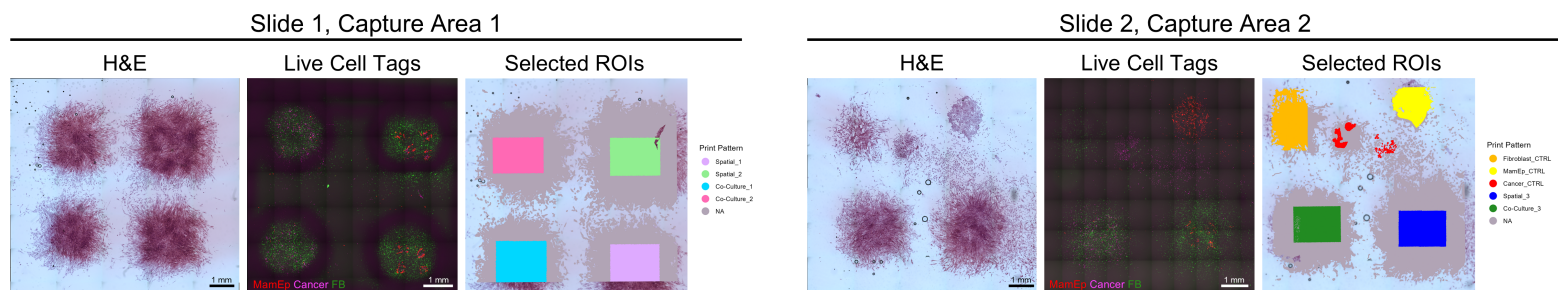**B**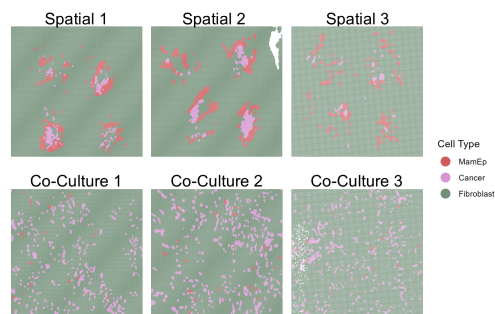**C**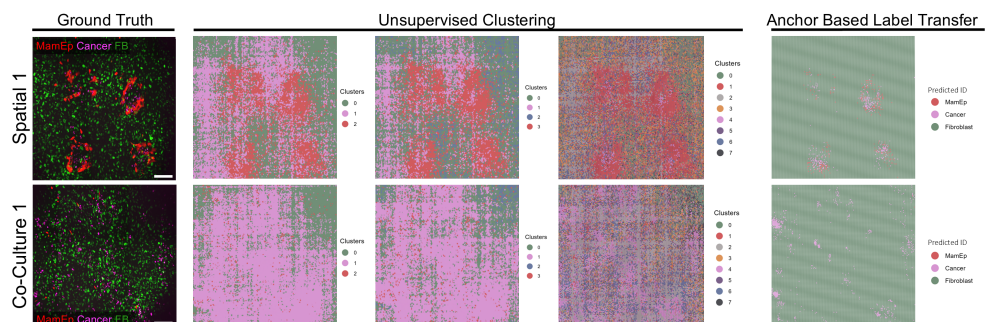**D**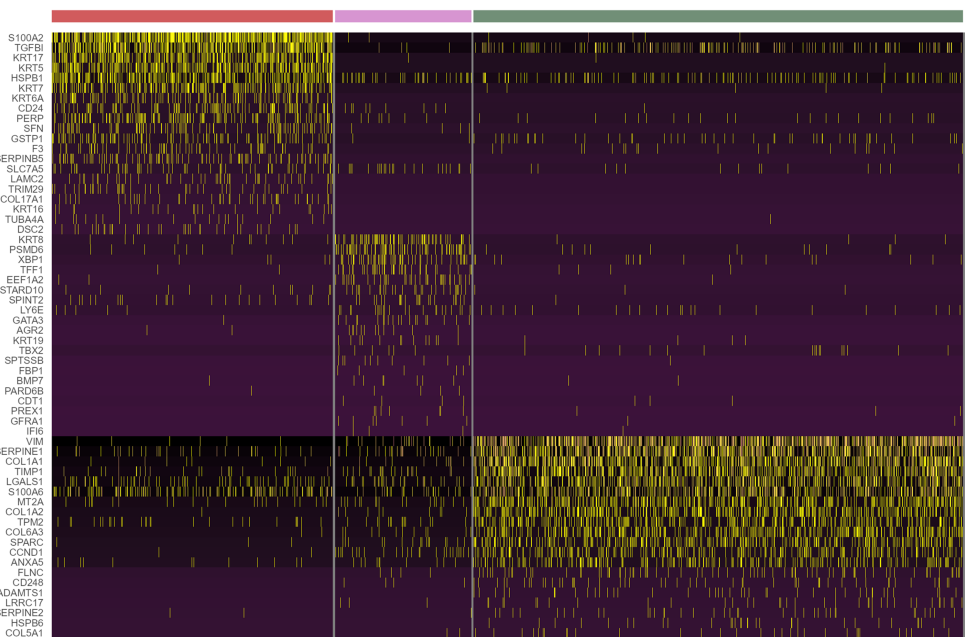**E**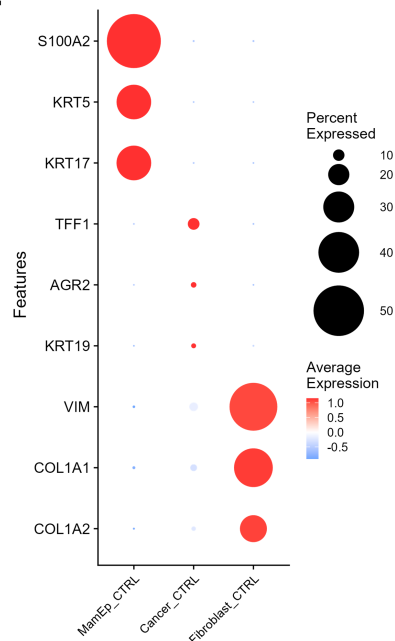**F**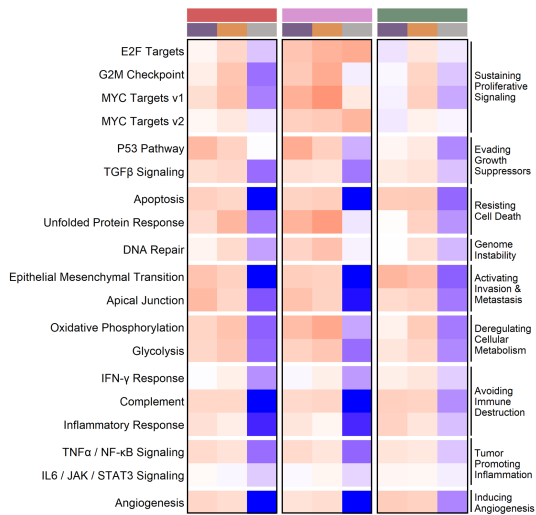**G**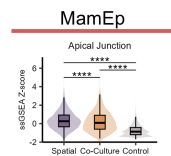**H**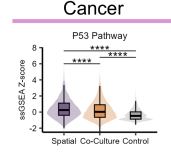**I**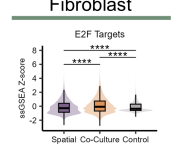**J**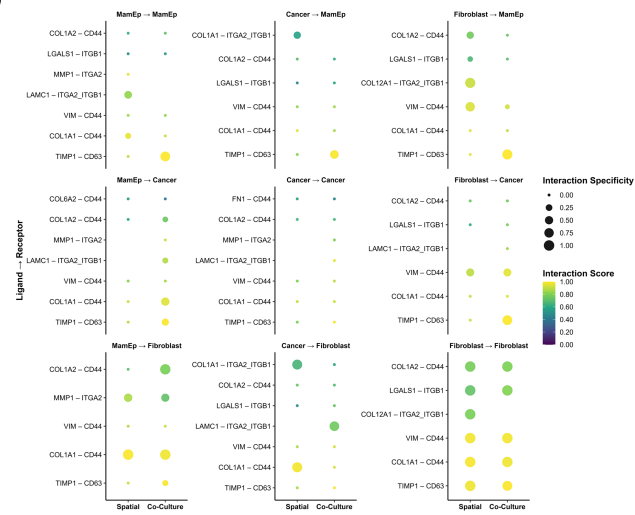

Supplement: Supplementary file 2 [file 1d21fbf9ca999f30b3f72424.pdf]

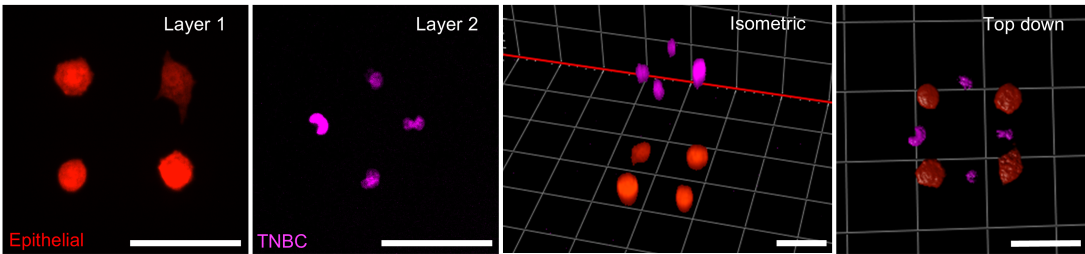

Supplement: Supplementary file 3 [file 80de90367ae97b3a005e3281.pdf]

**A**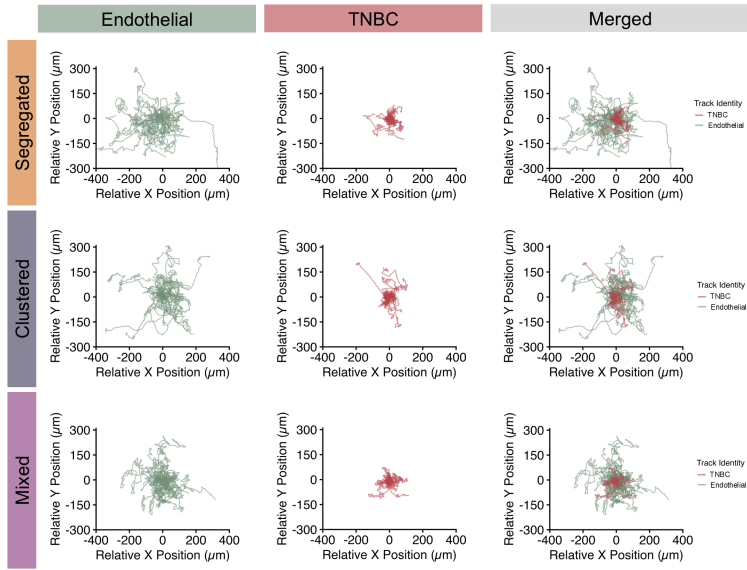**B**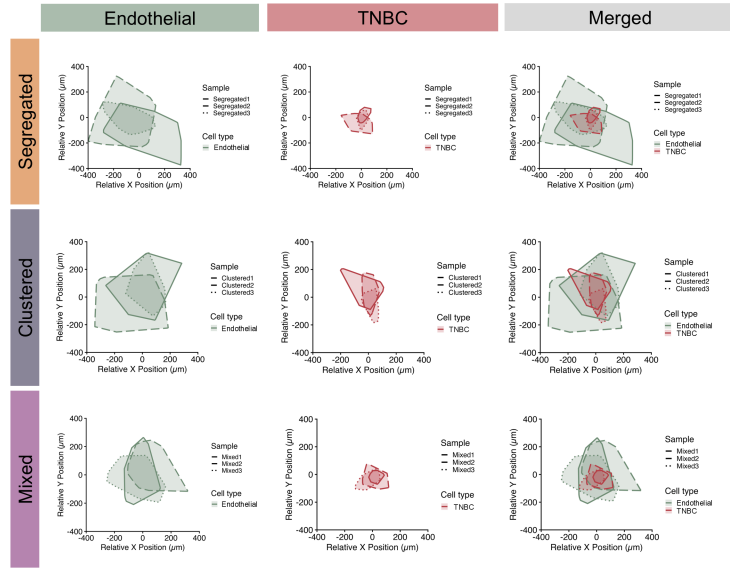**C**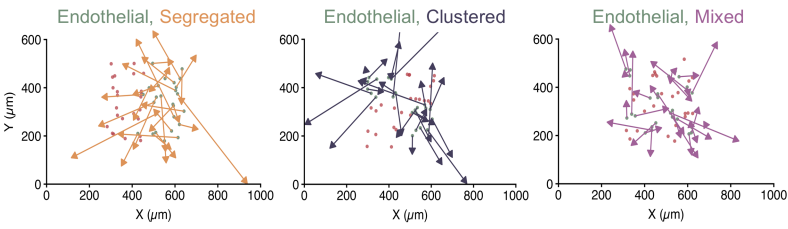**E**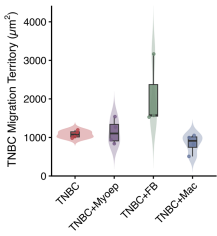**F**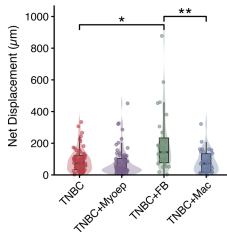**G**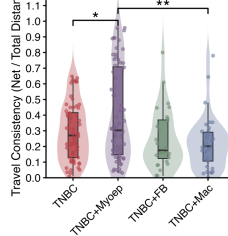**D**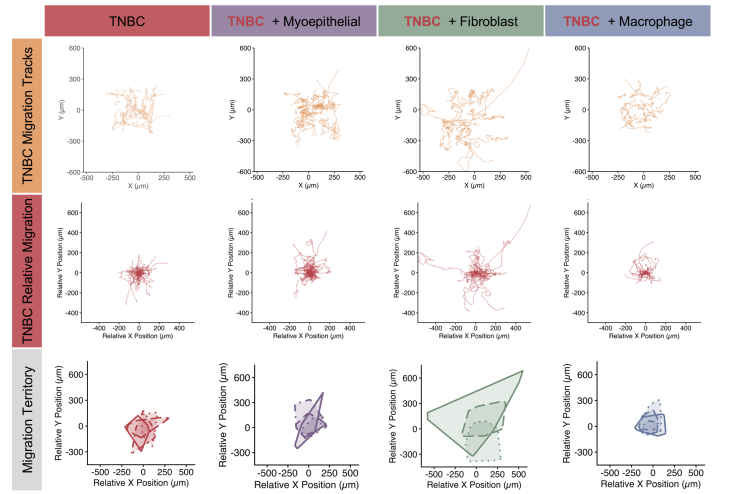

Supplement: Supplementary file 5 [file bd1f57209bf6948b3980fe86.pdf]

**A**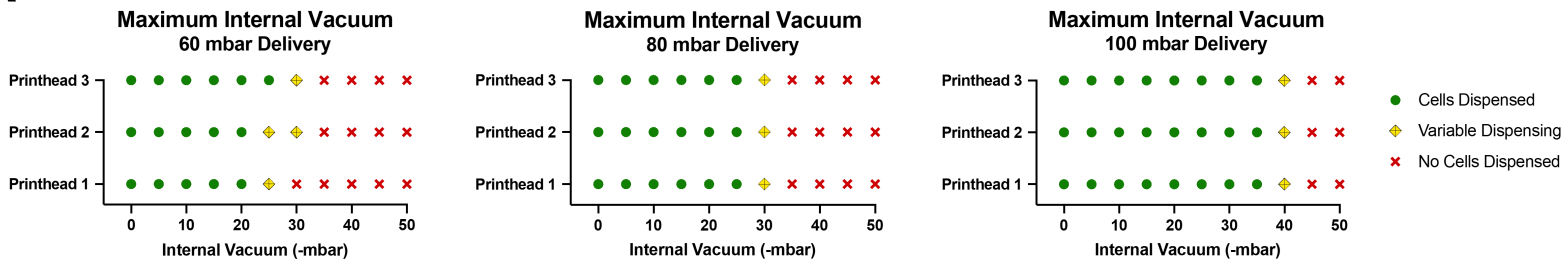**B**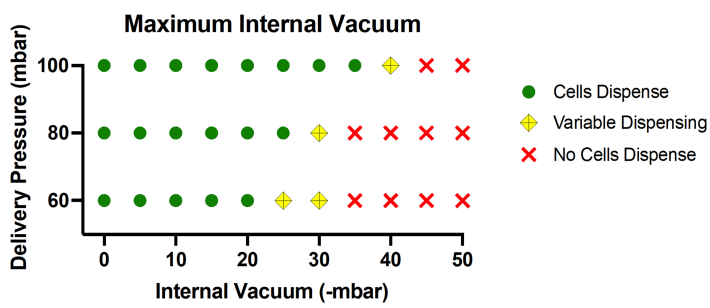**C**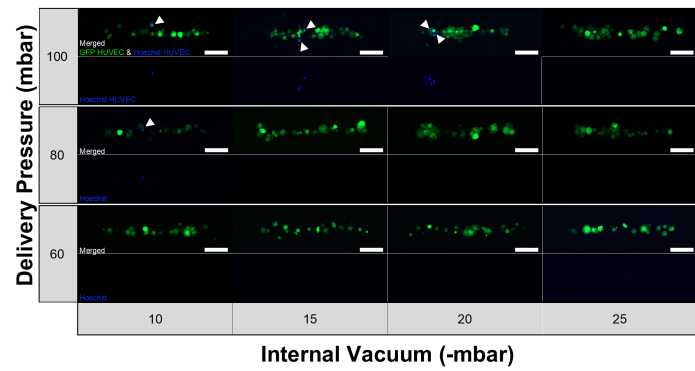**D**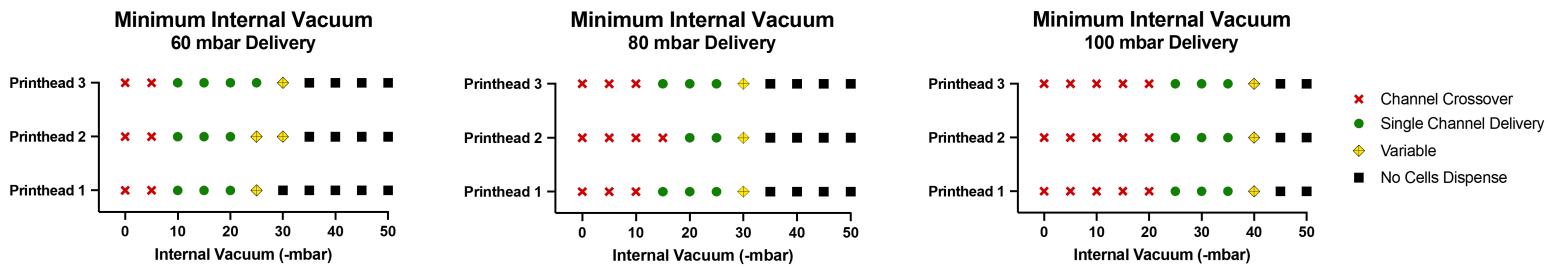**E**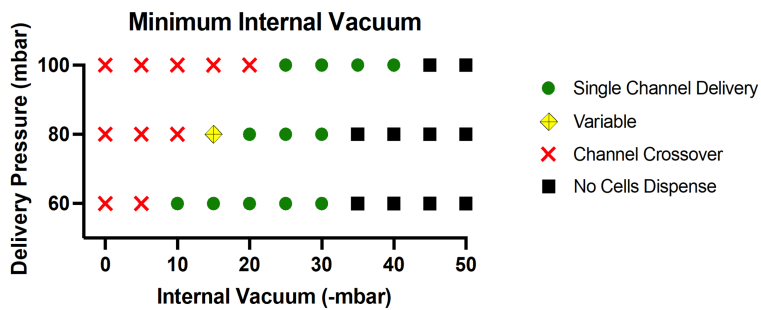

Supplement: Supplementary file 6 [file d06d04e195642a9f133012dd.pdf]

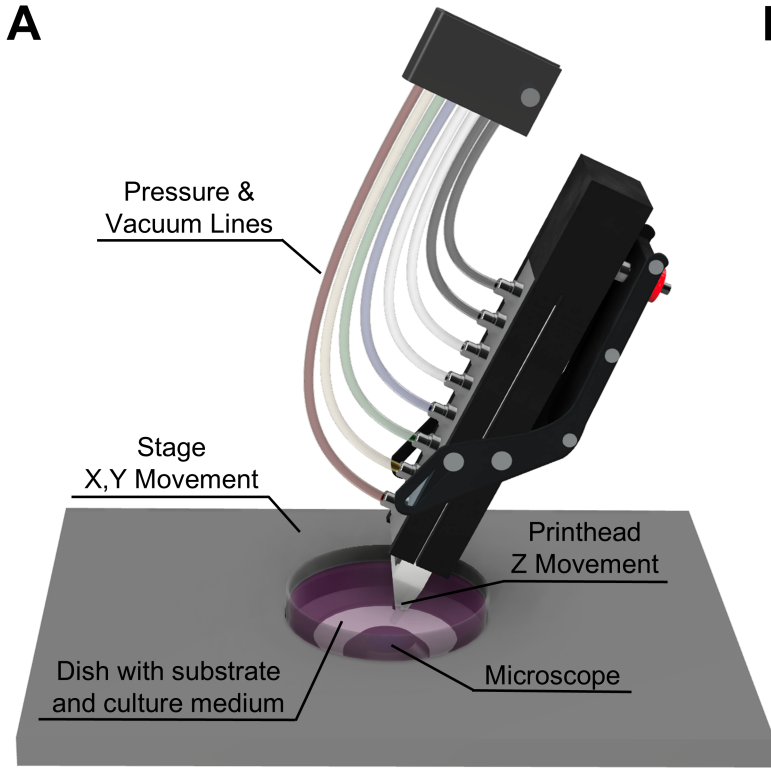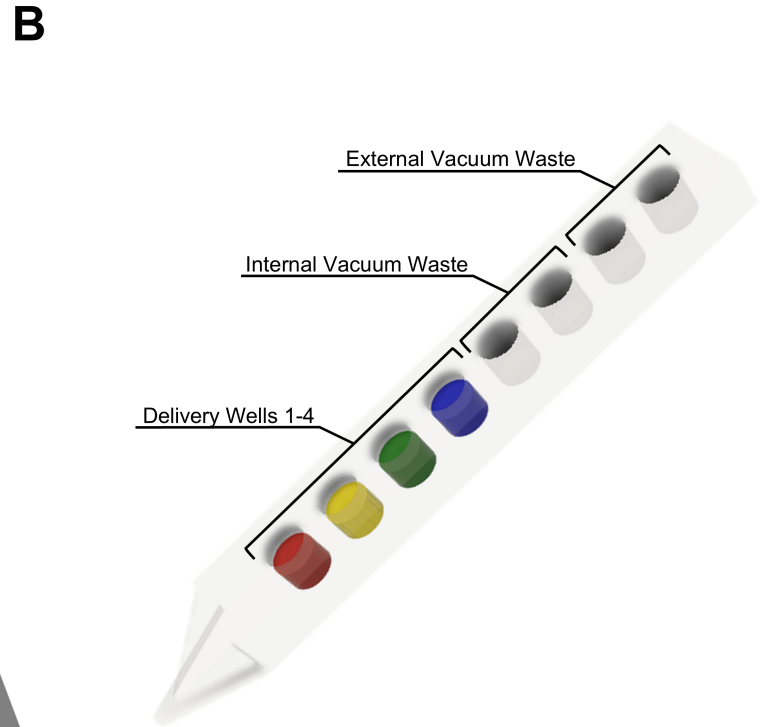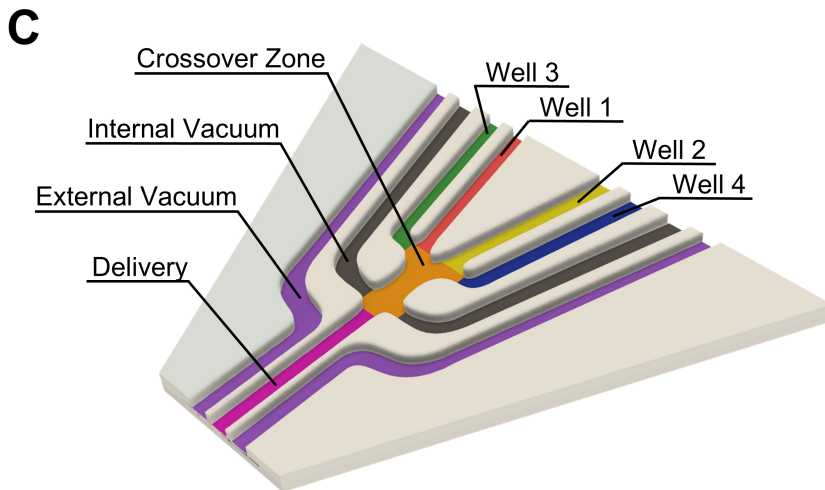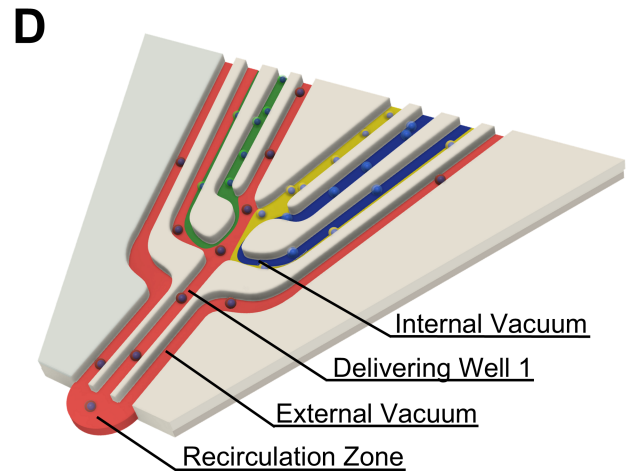

Supplement: Supplementary file 7 [file d7cef5ac1a72d990a5e1939e.pdf]

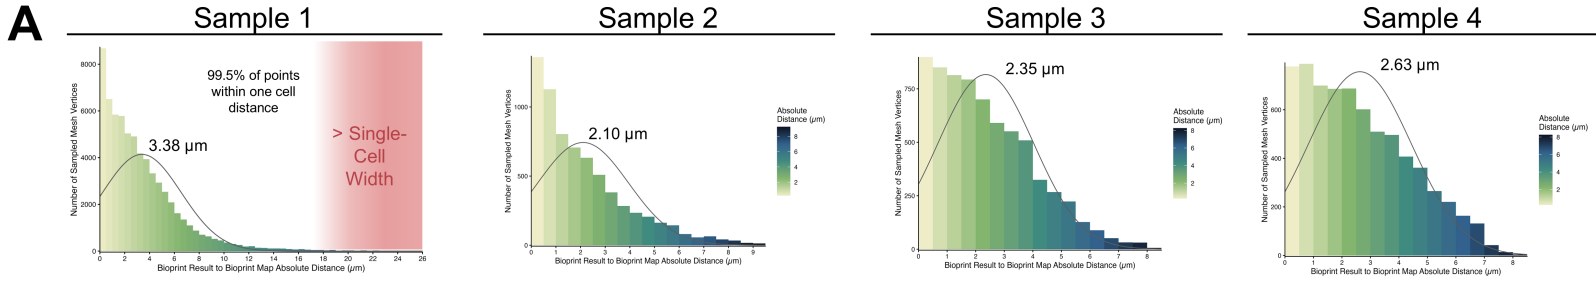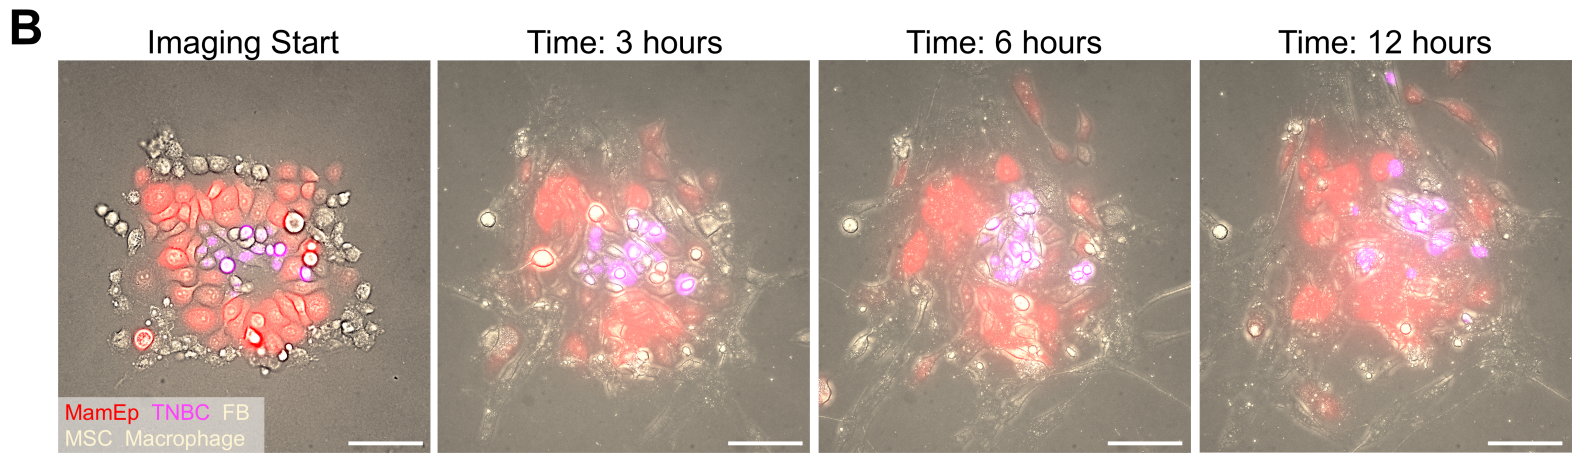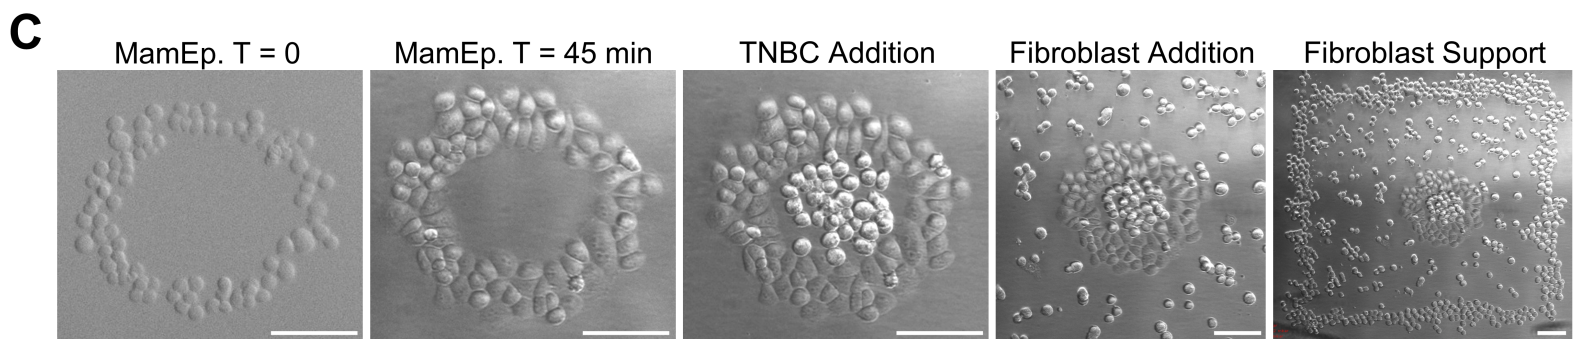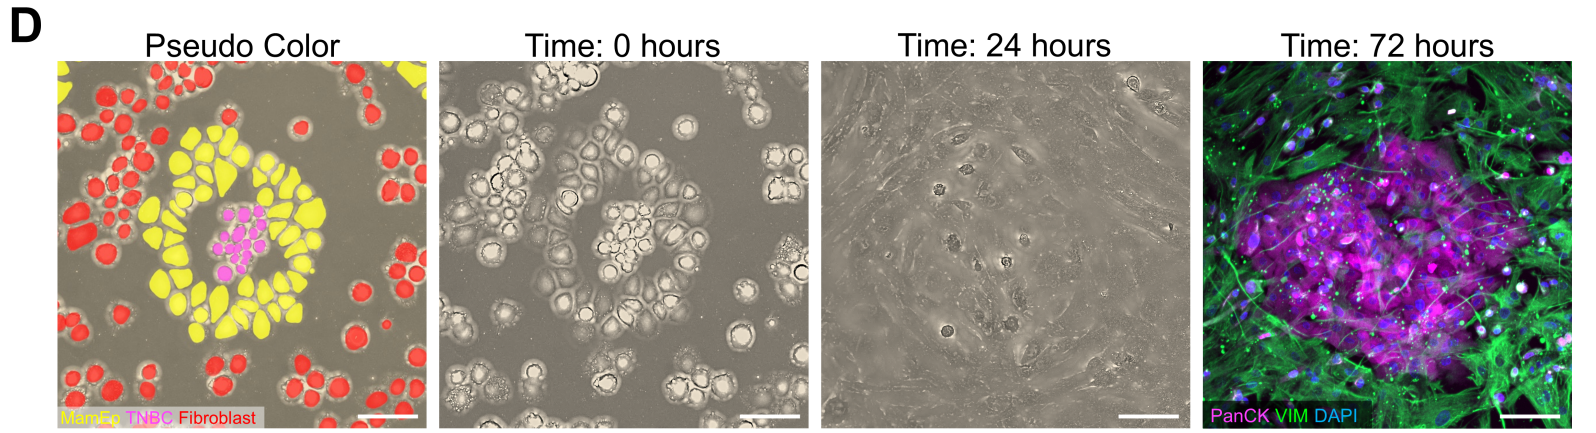

Supplement: Supplementary file 8 [file da2248f0477f15bb7f14010d.pdf]

**A**

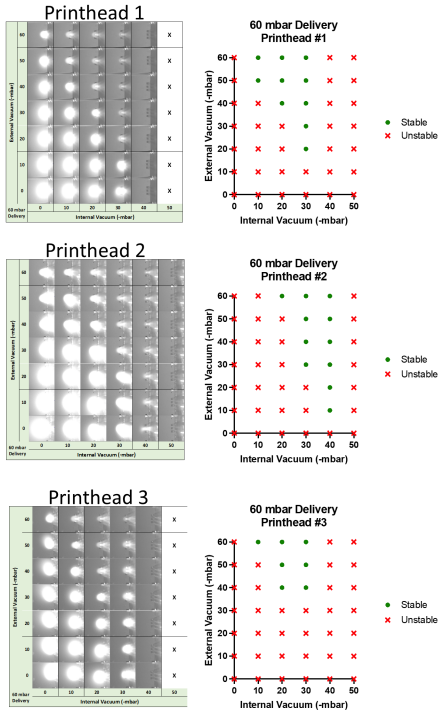

**B**

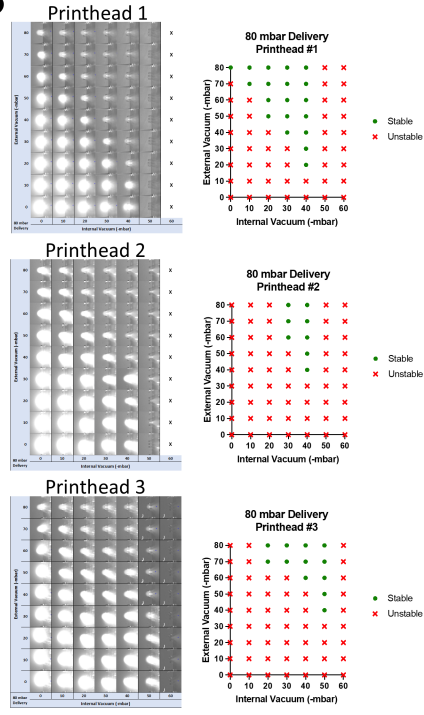

**C**

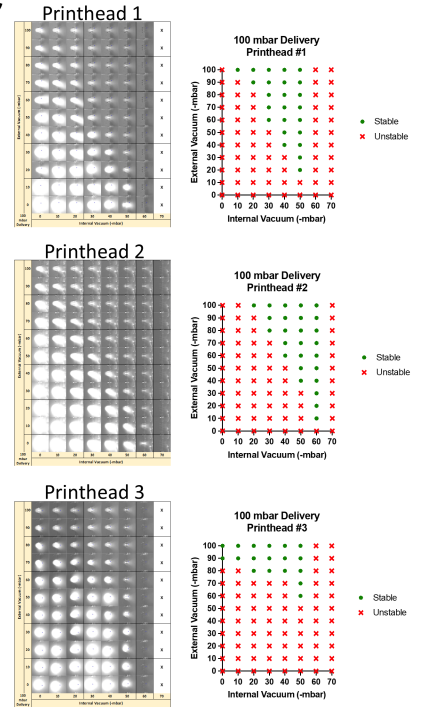

**D**

### Recirculation Zone Stability

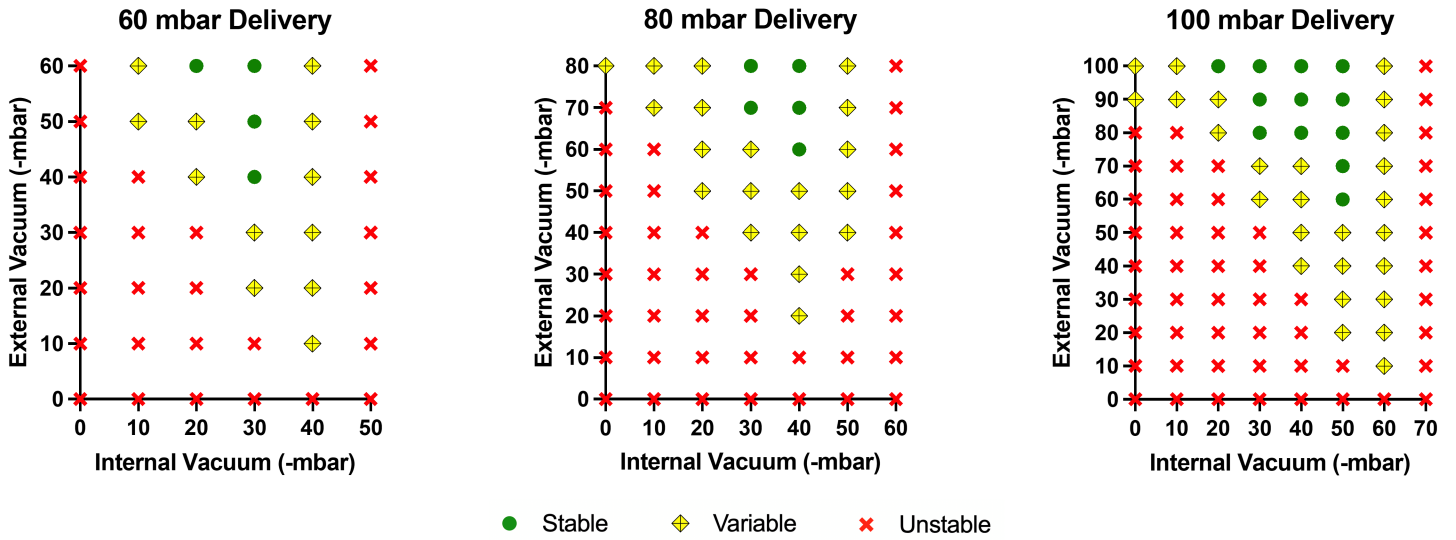

Supplement: Supplementary file 9 [file fe1b6ae4f29b62de31b4fbd4.pdf]
